# Supplementary material for: Active poly‐GA vaccination prevents microglia activation and motor deficits in a C9orf72 mouse model
Source: PubMed Central journal article supplement (PMC7005532; doi:10.15252/emmm.201910919), 2019-12-20
Supplement: EMMM-12-e10919-s001.pdf [file EMMM-12-e10919-s001.pdf]

## **Active poly-GA vaccination prevents microglia activation and motor deficits in a *C9orf72* mouse model**

Qihui Zhou, Nikola Mareljic, Meike Michaelsen, Samira Parhizkar, Steffanie Heindl, Brigitte Nuscher, Daniel Farny, Mareike Czuppa, Carina Schludi, Alexander Graf, Stefan Krebs, Helmut Blum, Regina Feederle, Stefan Roth, Christian Haass, Thomas Arzberger, Arthur Liesz, Dieter Edbauer

Running title: Poly-GA vaccination in *C9orf72* ALS/FTD

Key words: ALS, FTD, *C9orf72*, neurodegeneration, immunotherapy

### **Table of contents**

#### **Supplemental Tables**

**Table S1:** Statistical analysis for anti-GA response in Fig. 1B

**Table S2:** Statistical analysis for beam walk test in Fig. 2A

## Supplemental Tables

**Table S1**

Statistical analysis for anti-GA response in Fig. 1B

| Age (weeks) | Group                               | P value |
|-------------|-------------------------------------|---------|
| 7           | TG-PBS vs WT-PBS                    | >0.9999 |
|             | TG-Ova-(GA) <sub>10</sub> vs WT-PBS | >0.9999 |
|             | TG-Ova-(GA) <sub>10</sub> vs TG-PBS | >0.9999 |
| 9           | TG-PBS vs WT-PBS                    | >0.9999 |
|             | TG-Ova-(GA) <sub>10</sub> vs WT-PBS | >0.9999 |
|             | TG-Ova-(GA) <sub>10</sub> vs TG-PBS | >0.9999 |
| 13          | TG-PBS vs WT-PBS                    | >0.9999 |
|             | TG-Ova-(GA) <sub>10</sub> vs WT-PBS | 0.8286  |
|             | TG-Ova-(GA) <sub>10</sub> vs TG-PBS | 0.8464  |
| 17          | TG-PBS vs WT-PBS                    | >0.9999 |
|             | TG-Ova-(GA) <sub>10</sub> vs WT-PBS | <0.0001 |
|             | TG-Ova-(GA) <sub>10</sub> vs TG-PBS | <0.0001 |
| 21          | TG-PBS vs WT-PBS                    | >0.9999 |
|             | TG-Ova-(GA) <sub>10</sub> vs WT-PBS | <0.0001 |
|             | TG-Ova-(GA) <sub>10</sub> vs TG-PBS | <0.0001 |
| 25          | TG-PBS vs WT-PBS                    | >0.9999 |
|             | TG-Ova-(GA) <sub>10</sub> vs WT-PBS | <0.0001 |
|             | TG-Ova-(GA) <sub>10</sub> vs TG-PBS | <0.0001 |
| 29          | TG-PBS vs WT-PBS                    | >0.9999 |
|             | TG-Ova-(GA) <sub>10</sub> vs WT-PBS | <0.0001 |
|             | TG-Ova-(GA) <sub>10</sub> vs TG-PBS | <0.0001 |

**Table S2**

Statistical analysis for beam walk test in Fig. 2A

|          | TG-PBS vs WT-PBS | TG-OVA-(GA) <sub>10</sub> vs WT-PBS | TG OVA-(GA) <sub>10</sub> vs TG-PBS | TG-(GA) <sub>15</sub> vs WT-PBS |
|----------|------------------|-------------------------------------|-------------------------------------|---------------------------------|
| 9 weeks  | 0.8730014        | 0.914881408                         | 0.660597254                         | 0.282132                        |
| 11 weeks | 0.544982788      | 0.544982788                         | 0.971550741                         | 0.607581                        |
| 13 weeks | 0.412916226      | 0.412916226                         | 0.711801435                         | 0.412916                        |
| 15 weeks | 0.010732991      | 0.043912676                         | 0.297386709                         | 0.041121                        |
| 17 weeks | 0.00405365       | 0.018344738                         | 0.164924499                         | 0.010073                        |
| 19 weeks | 0.003147226      | 0.481335516                         | 0.021661226                         | 0.002403                        |
| 21 weeks | 0.001395696      | 0.032603915                         | 0.029964124                         | 0.001396                        |
| 23 weeks | 0.005474251      | 0.008110434                         | 0.103991363                         | 0.00811                         |
| 25 weeks | 0.003995691      | 0.066337767                         | 0.073134623                         | 0.001266                        |
| 27 weeks | 0.005370445      | 0.12551599                          | 0.01600375                          | 0.00537                         |
| 29 weeks | 0.001353034      | 0.022590417                         | 0.01546881                          | 0.001353                        |
| 31 weeks | 0.00170716       | 0.084476449                         | 0.026083767                         | 0.001707                        |
