# Supplementary material for: Active poly‐GA vaccination prevents microglia activation and motor deficits in a C9orf72 mouse model
Source: PubMed Central journal article supplement (PMC7005532; doi:10.15252/emmm.201910919), 2019-12-20
Supplement: EMMM-12-e10919-s002.pdf [file EMMM-12-e10919-s002.pdf]

## Expanded View Figures

### Figure EV1. Immunization regimen caused no overt side effects in mice.

- A Body weight curve of vaccinated female mice (left panel) and male mice (right panel) on a standard diet. Number of mice per group as indicated. Two-way repeated-measure ANOVA (group  $\times$  time) revealed a non-significant main effect of group (females:  $F_{2,13} = 0.3747$ ,  $P = 0.6947$ ; males:  $F_{2,11} = 3.042$ ,  $P = 0.0888$ ) and significant effect of time (females:  $F_{5,65} = 13.28$ ,  $P < 0.0001$ ; males:  $F_{5,55} = 102.6$ ,  $P < 0.0001$ ) and a non-significant interaction between factors (females:  $F_{10,65} = 0.8671$ ,  $P = 0.5678$ ; males:  $F_{10,55} = 1.067$ ,  $P = 0.4030$ ), followed by Tukey's *post hoc* test.
- B Leukocyte distribution in the spleen measured by flow cytometry at 32 weeks of age,  $n = 5-7$  mice per group as indicated. Gating of the different cell populations is shown in a representative scatter plot. Tukey-style box plot shows 25<sup>th</sup>, 50<sup>th</sup>, and 75<sup>th</sup> percentiles, and whiskers extend to  $\pm 1.5$  interquartile range. One-way ANOVA and Tukey's *post hoc* revealed no significant changes in the frequency of different cell subtypes. B cells:  $P = 0.4962$ ; monocytes:  $P = 0.8126$ ; CD4 T cells:  $P = 0.9443$ ; CD8 T cells:  $P = 0.6648$ .

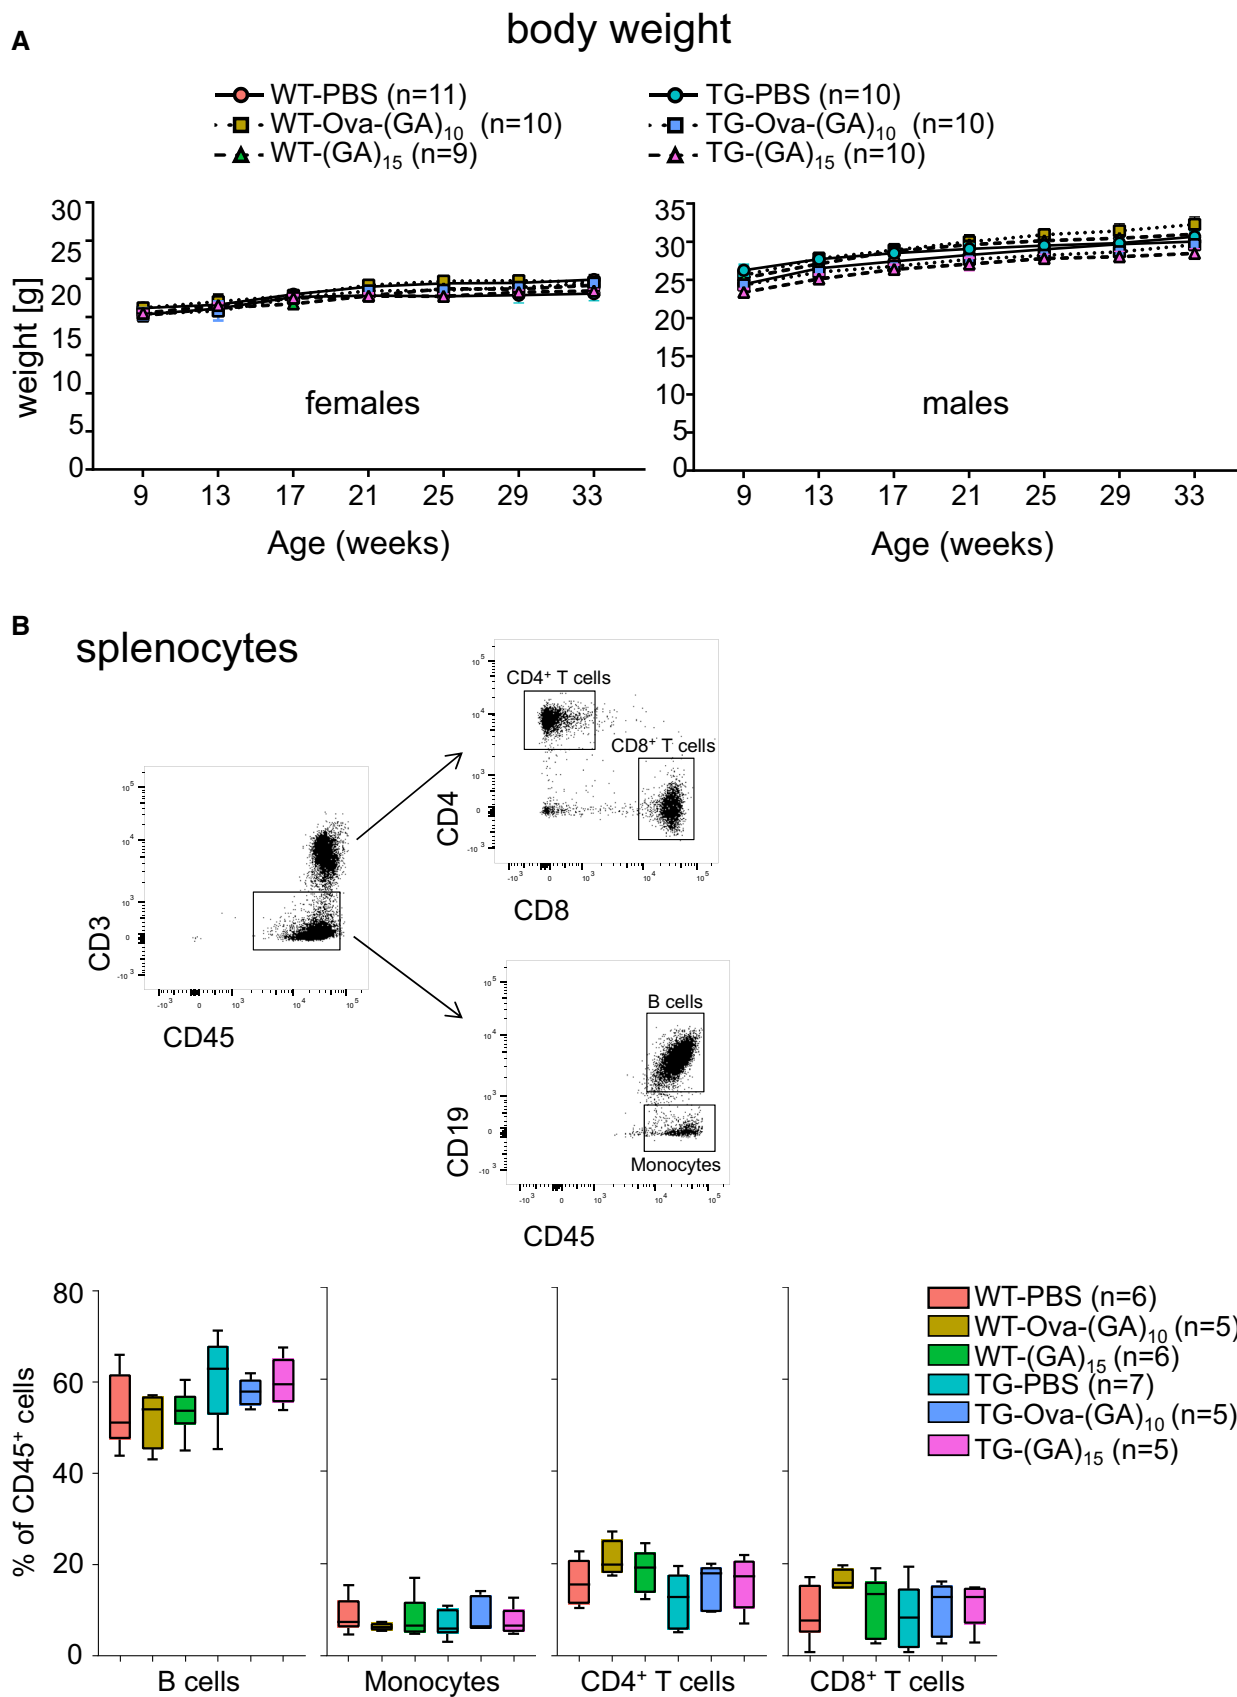

Figure EV1.

**Figure EV2. Antisera detect poly-GA aggregates specifically.**

- A Immunoblot of HEK293 cells transfected with the indicated poly-GA-expressing construct and GFP control using monoclonal anti-GA clone 1A12 and antiserum from Ova-(GA)<sub>10</sub>-vaccinated mice. Calnexin is used as a loading control. A representative of three experiments is shown.
- B Immunoblot of HEK293 cells transfected with the indicated DPR-expressing construct and GFP control using monoclonal anti-GA clone 1A12 and antiserum from Ova-(GA)<sub>10</sub>-vaccinated mice. Calnexin is used as a loading control. A representative of three experiments is shown.
- C HEK293 cells were transfected with (GA)<sub>175</sub>-GFP or GFP control and analyzed by immunofluorescence using a mouse monoclonal anti-GA antibody or antisera from vaccinated mice. Scale bar indicates 40  $\mu$ m. A representative of three experiments is shown.

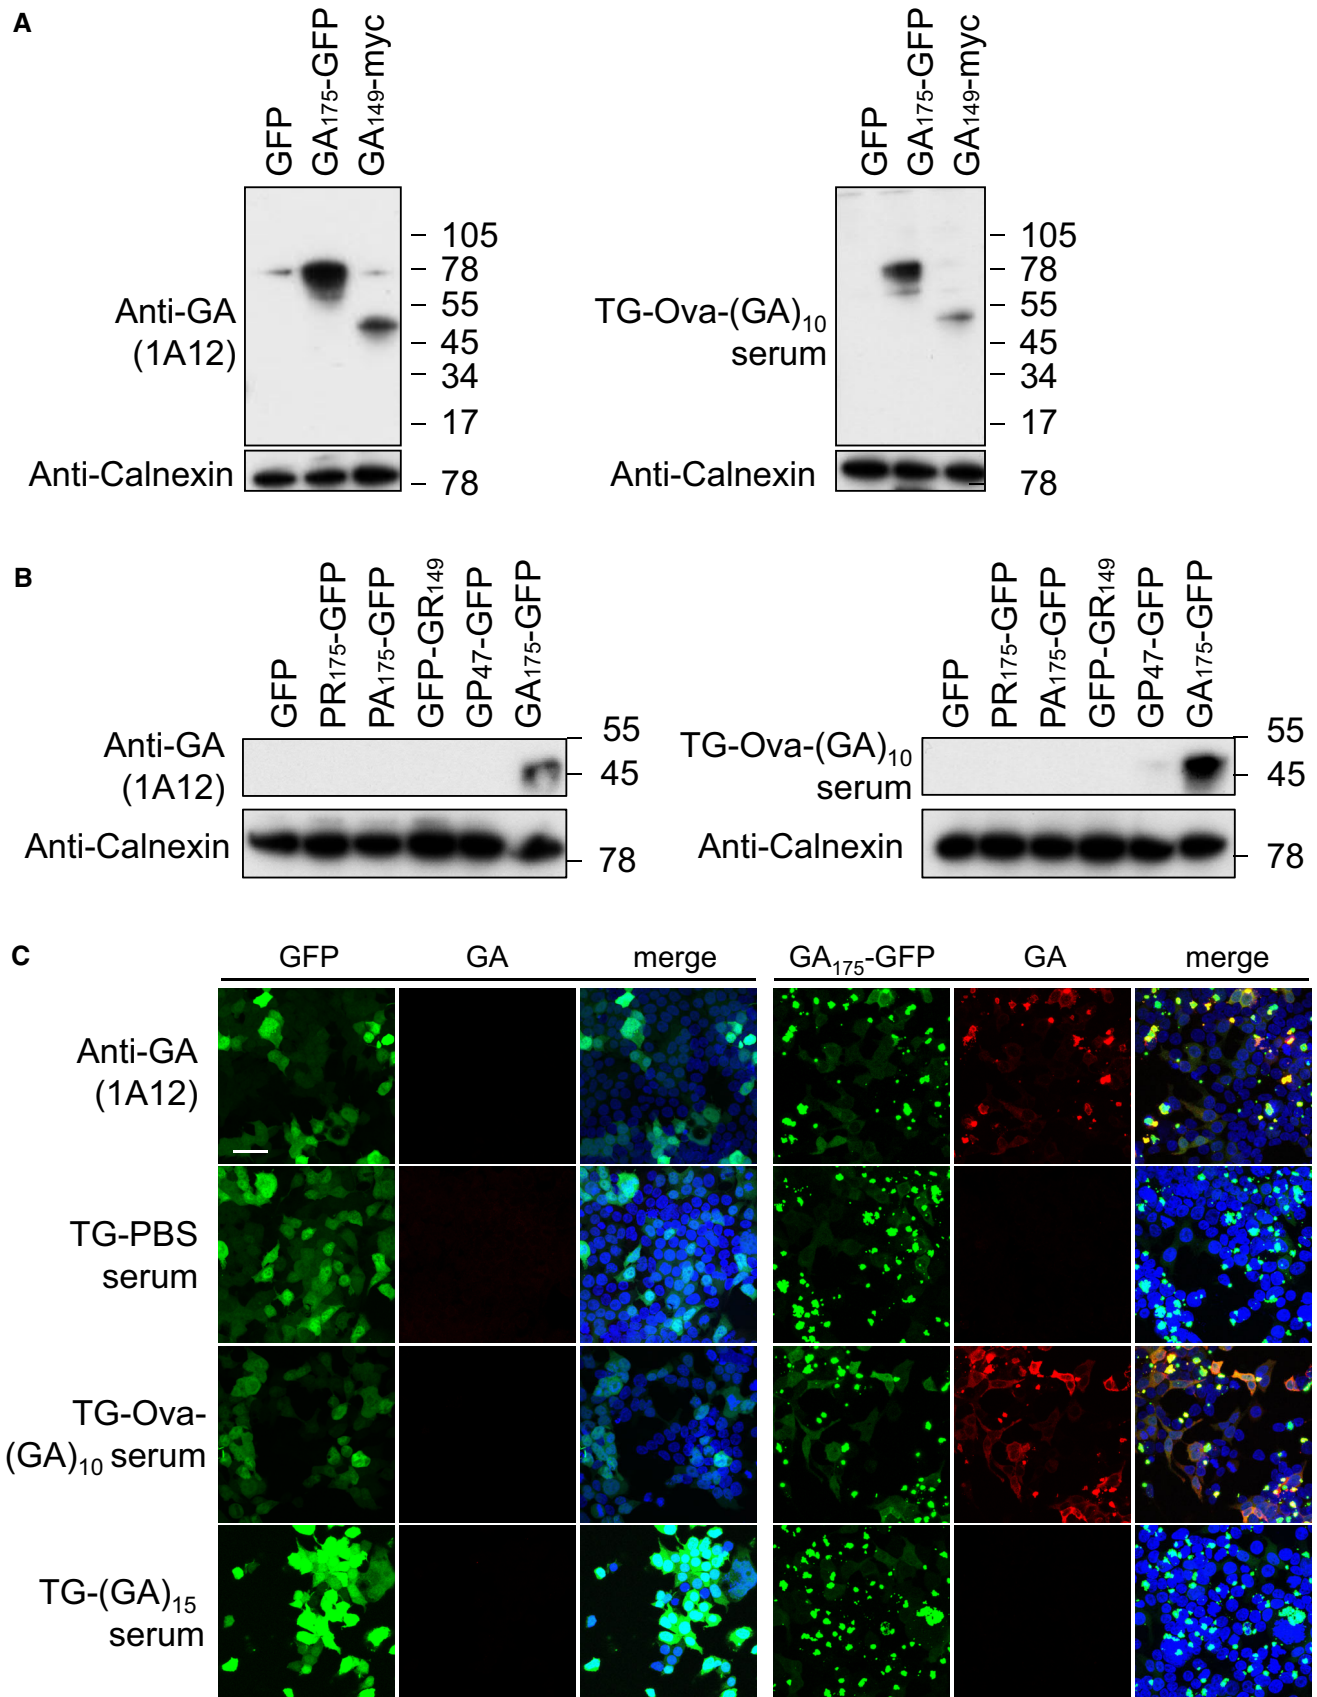

Figure EV2.

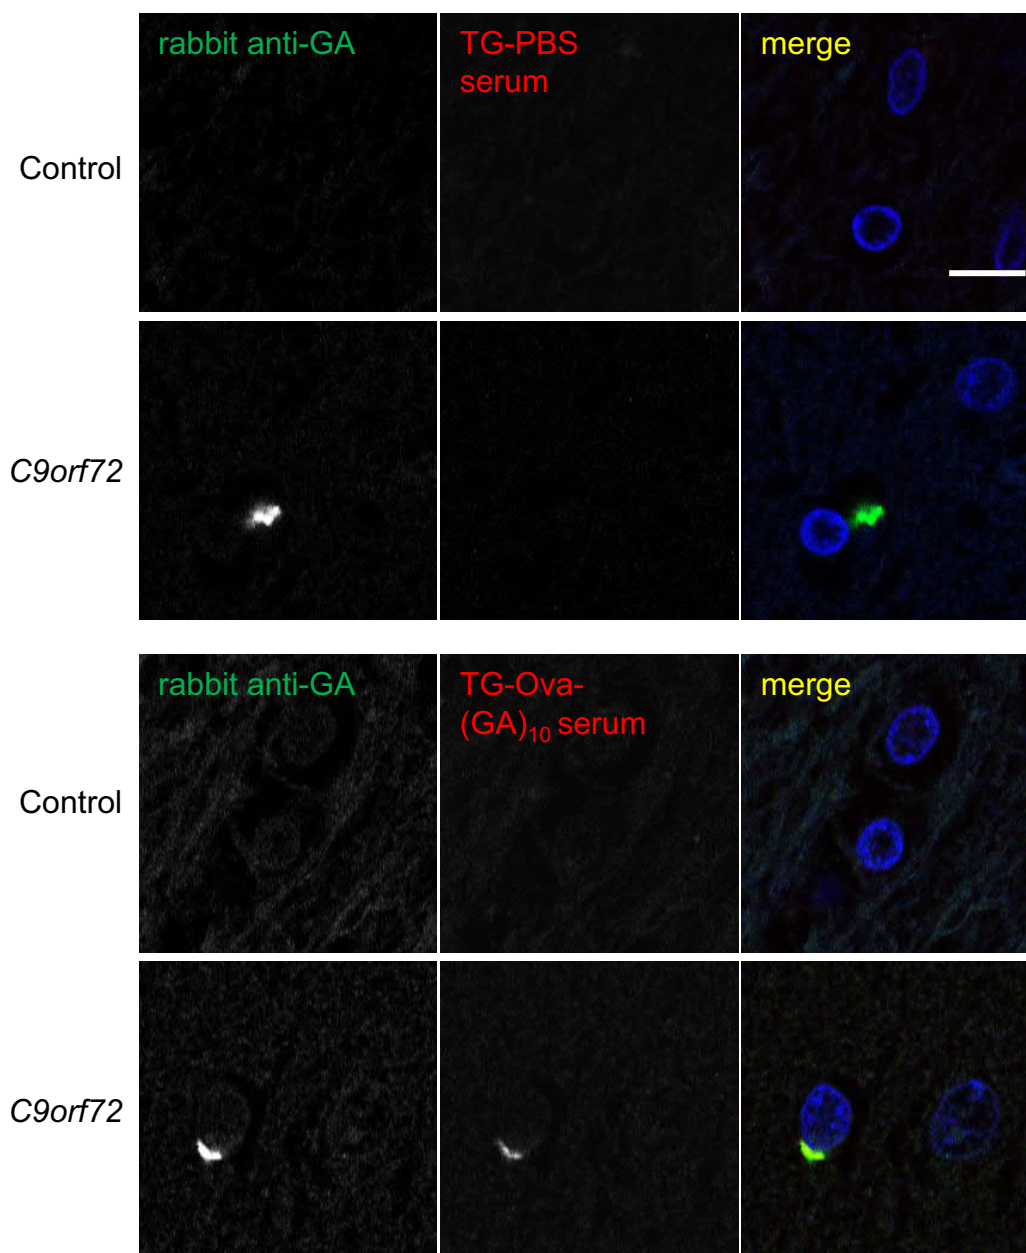

**Figure EV3. Antisera detect poly-GA inclusions in *C9orf72* patients specifically.**

Immunofluorescent staining of sections from a *C9orf72* patient and a healthy control. Neuronal cytoplasmic inclusions in occipital cortex were stained using a commercial rabbit polyclonal antibody (green) and antisera from Ova-GA-vaccinated mice (red). Nuclei were stained with DAPI (blue). Scale bar indicates 10  $\mu$ m.

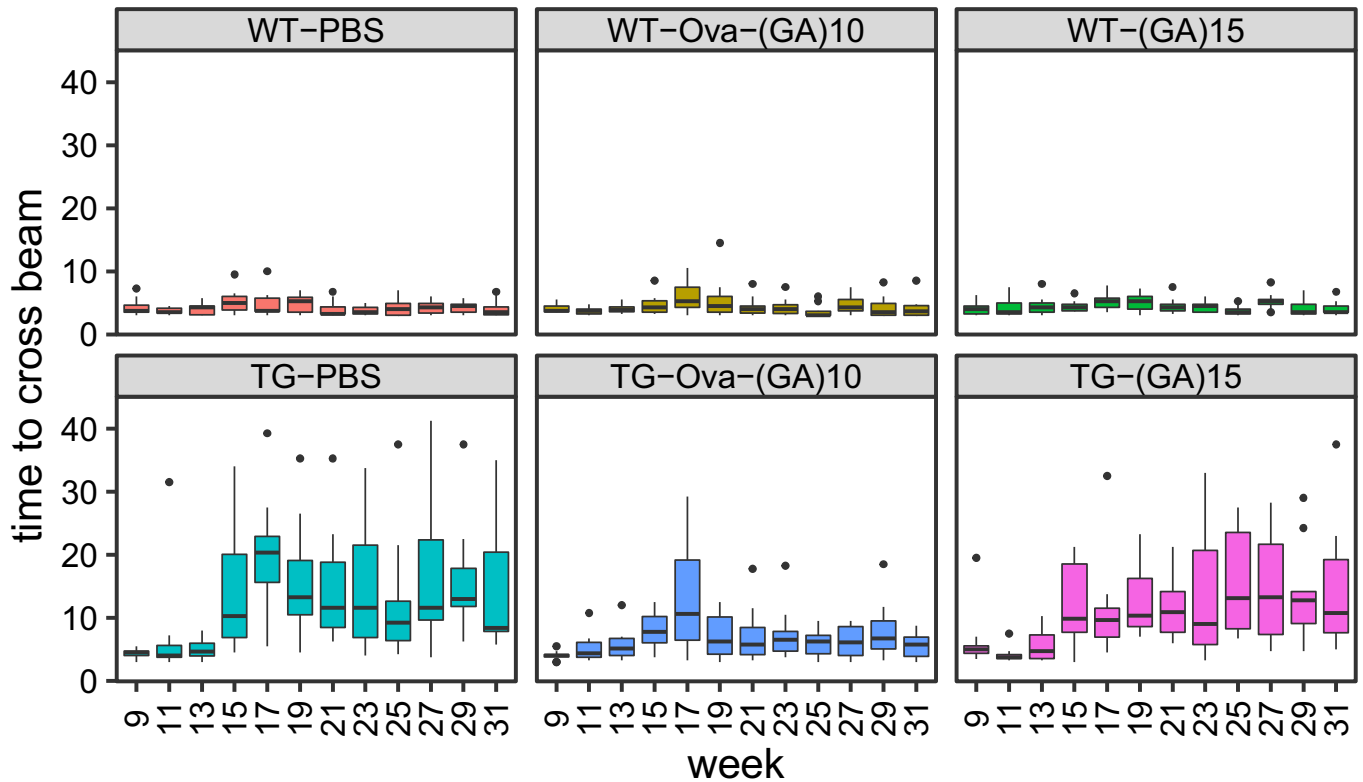

**Figure EV4. Ova-GA immunization prevents motor deficits.**

Longitudinal analysis of motor function in vaccinated GA-CFP mice and wild-type littermates in a beam walk assay (data from Fig 2A).  $n = 9-11$  mice per group as indicated. Average time to cross the beam from duplicate repeat measurements in consecutive weeks. Tukey-style box plot shows 25<sup>th</sup>, 50<sup>th</sup>, and 75<sup>th</sup> percentiles, and whiskers extend to  $\pm 1.5$  interquartile range. Outliers depicted as dots. Statistics are shown in Fig 2A and Appendix Table S2.

**Figure EV5. Ova-(GA)<sub>10</sub> immunization prevents microglia/macrophage activation and TDP-43 mislocalization.**

- A Analysis of microglia activation using Iba1 immunohistochemistry by measuring the area of Iba1 staining from complete spinal cord sections at 1-mm interval. Dot plot represents mean  $\pm$  SD from  $n = 3$  animals per group. One-way ANOVA, Tukey's *post hoc* test. \*\*\* $P < 0.001$ , ns not significant.  $F_{5,12} = 1.201$ ,  $P = 0.3655$ , TG-Ova-(GA)<sub>10</sub> vs. TG-PBS  $P < 0.0001$ , TG-(GA)<sub>15</sub> vs. TG-PBS  $P = 0.8573$ . TG-PBS vs. WT-PBS  $P < 0.0001$ .
- B–D Automated analysis of microglia/macrophage morphology from 100- $\mu$ m spinal cord sections stained for Iba1. Example reconstructions in (B). Scale bar indicates 30  $\mu$ m. Colors in scatter plot indicate the different mice (3–4 mice per groups), blue area covers 25<sup>th</sup> to 75<sup>th</sup> percentiles and horizontal lines indicates 25<sup>th</sup>, 50<sup>th</sup>, and 75<sup>th</sup> percentiles respectively  $n = 35-95$  number of microglia analyzed. Kruskal–Wallis test with Benjamini–Hochberg correction. \*\* $P < 0.01$ , \*\*\* $P < 0.001$ . (C) Kruskal–Wallis  $\chi^2 = 29.917$ ,  $df = 3$ ,  $P = 0.0000014$ ; TG-Ova-(GA)<sub>10</sub> vs. TG-PBS  $P = 0.0003$ ; WT-PBS vs. TG-PBS  $P = 0.000078$ . (D) Kruskal–Wallis  $\chi^2 = 28.532$ ,  $df = 3$ ,  $P = 0.0000028$ ; TG-Ova-(GA)<sub>10</sub> vs. TG-PBS  $P = 0.00041$ ; WT-PBS vs. TG-PBS  $P = 0.00032$ .
- E Representative immunofluorescence images of endogenous TDP-43 in the anterior horn of the spinal cord. In TG mice, more neurons show partial cytoplasmic mislocalization of TDP-43 (arrows). Scale bar indicates 20  $\mu$ m. Analysis in Fig 3E.

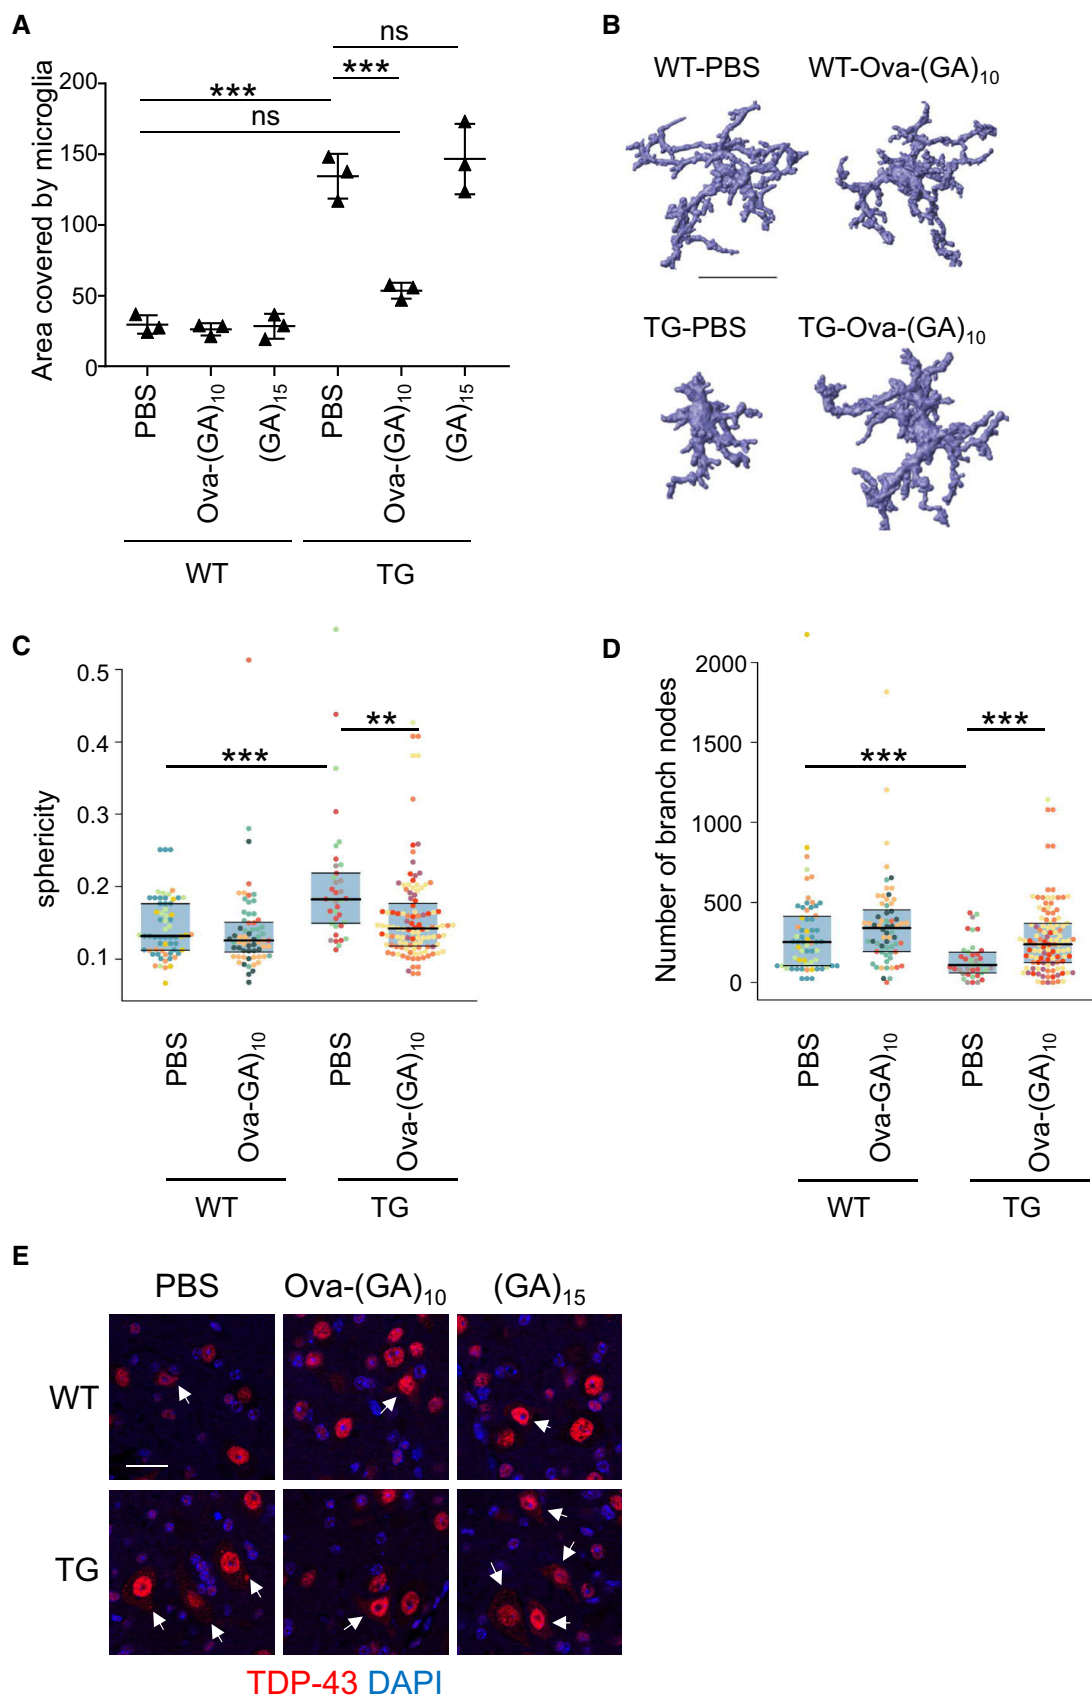

Figure EV5.
